# Supplementary material for: Molecular Characterization of a Chrysovirus Isolated From the Citrus Pathogen Penicillium crustosum and Related Fungicide Resistance Analysis
Source: Front Cell Infect Microbiol. 2019 May 15;9:156. doi: 10.3389/fcimb.2019.00156 (PMC6529537; doi:10.3389/fcimb.2019.00156)
Supplement: Supplementary file 1 [file Data_Sheet_1.doc]

**Supplementary materials**

**Molecular characterization of a chrysovirus isolated from the citrus pathogen *Penicillium crustosum* and related fungicide resistance analysis**

Shengqiang Wang1*, Zhu Yang1*, Tingfu Zhang1*, Na Li2, Qianwen Cao1, Guoqi Li1, Yongze Yuan1**, Deli Liu1**

1Hubei Key Laboratory of Genetic Regulation and Integrative Biology, School of Life Sciences, Central China Normal University, Wuhan 430079, P.R.China

2College of Life Science and Technology, Honghe University, Mengzi, 661199, P.R.China

*These authors contributed equally to this work.

**Correspondence: Yongze Yuan ([yuan_yongze@163.com](mailto:yuan_yongze@163.com)) and Deli Liu ([ldl@mail.ccnu.edu.cn](mailto:ldl@mail.ccnu.edu.cn); [deliliu2013@163.com](mailto:deliliu2013@163.com)).


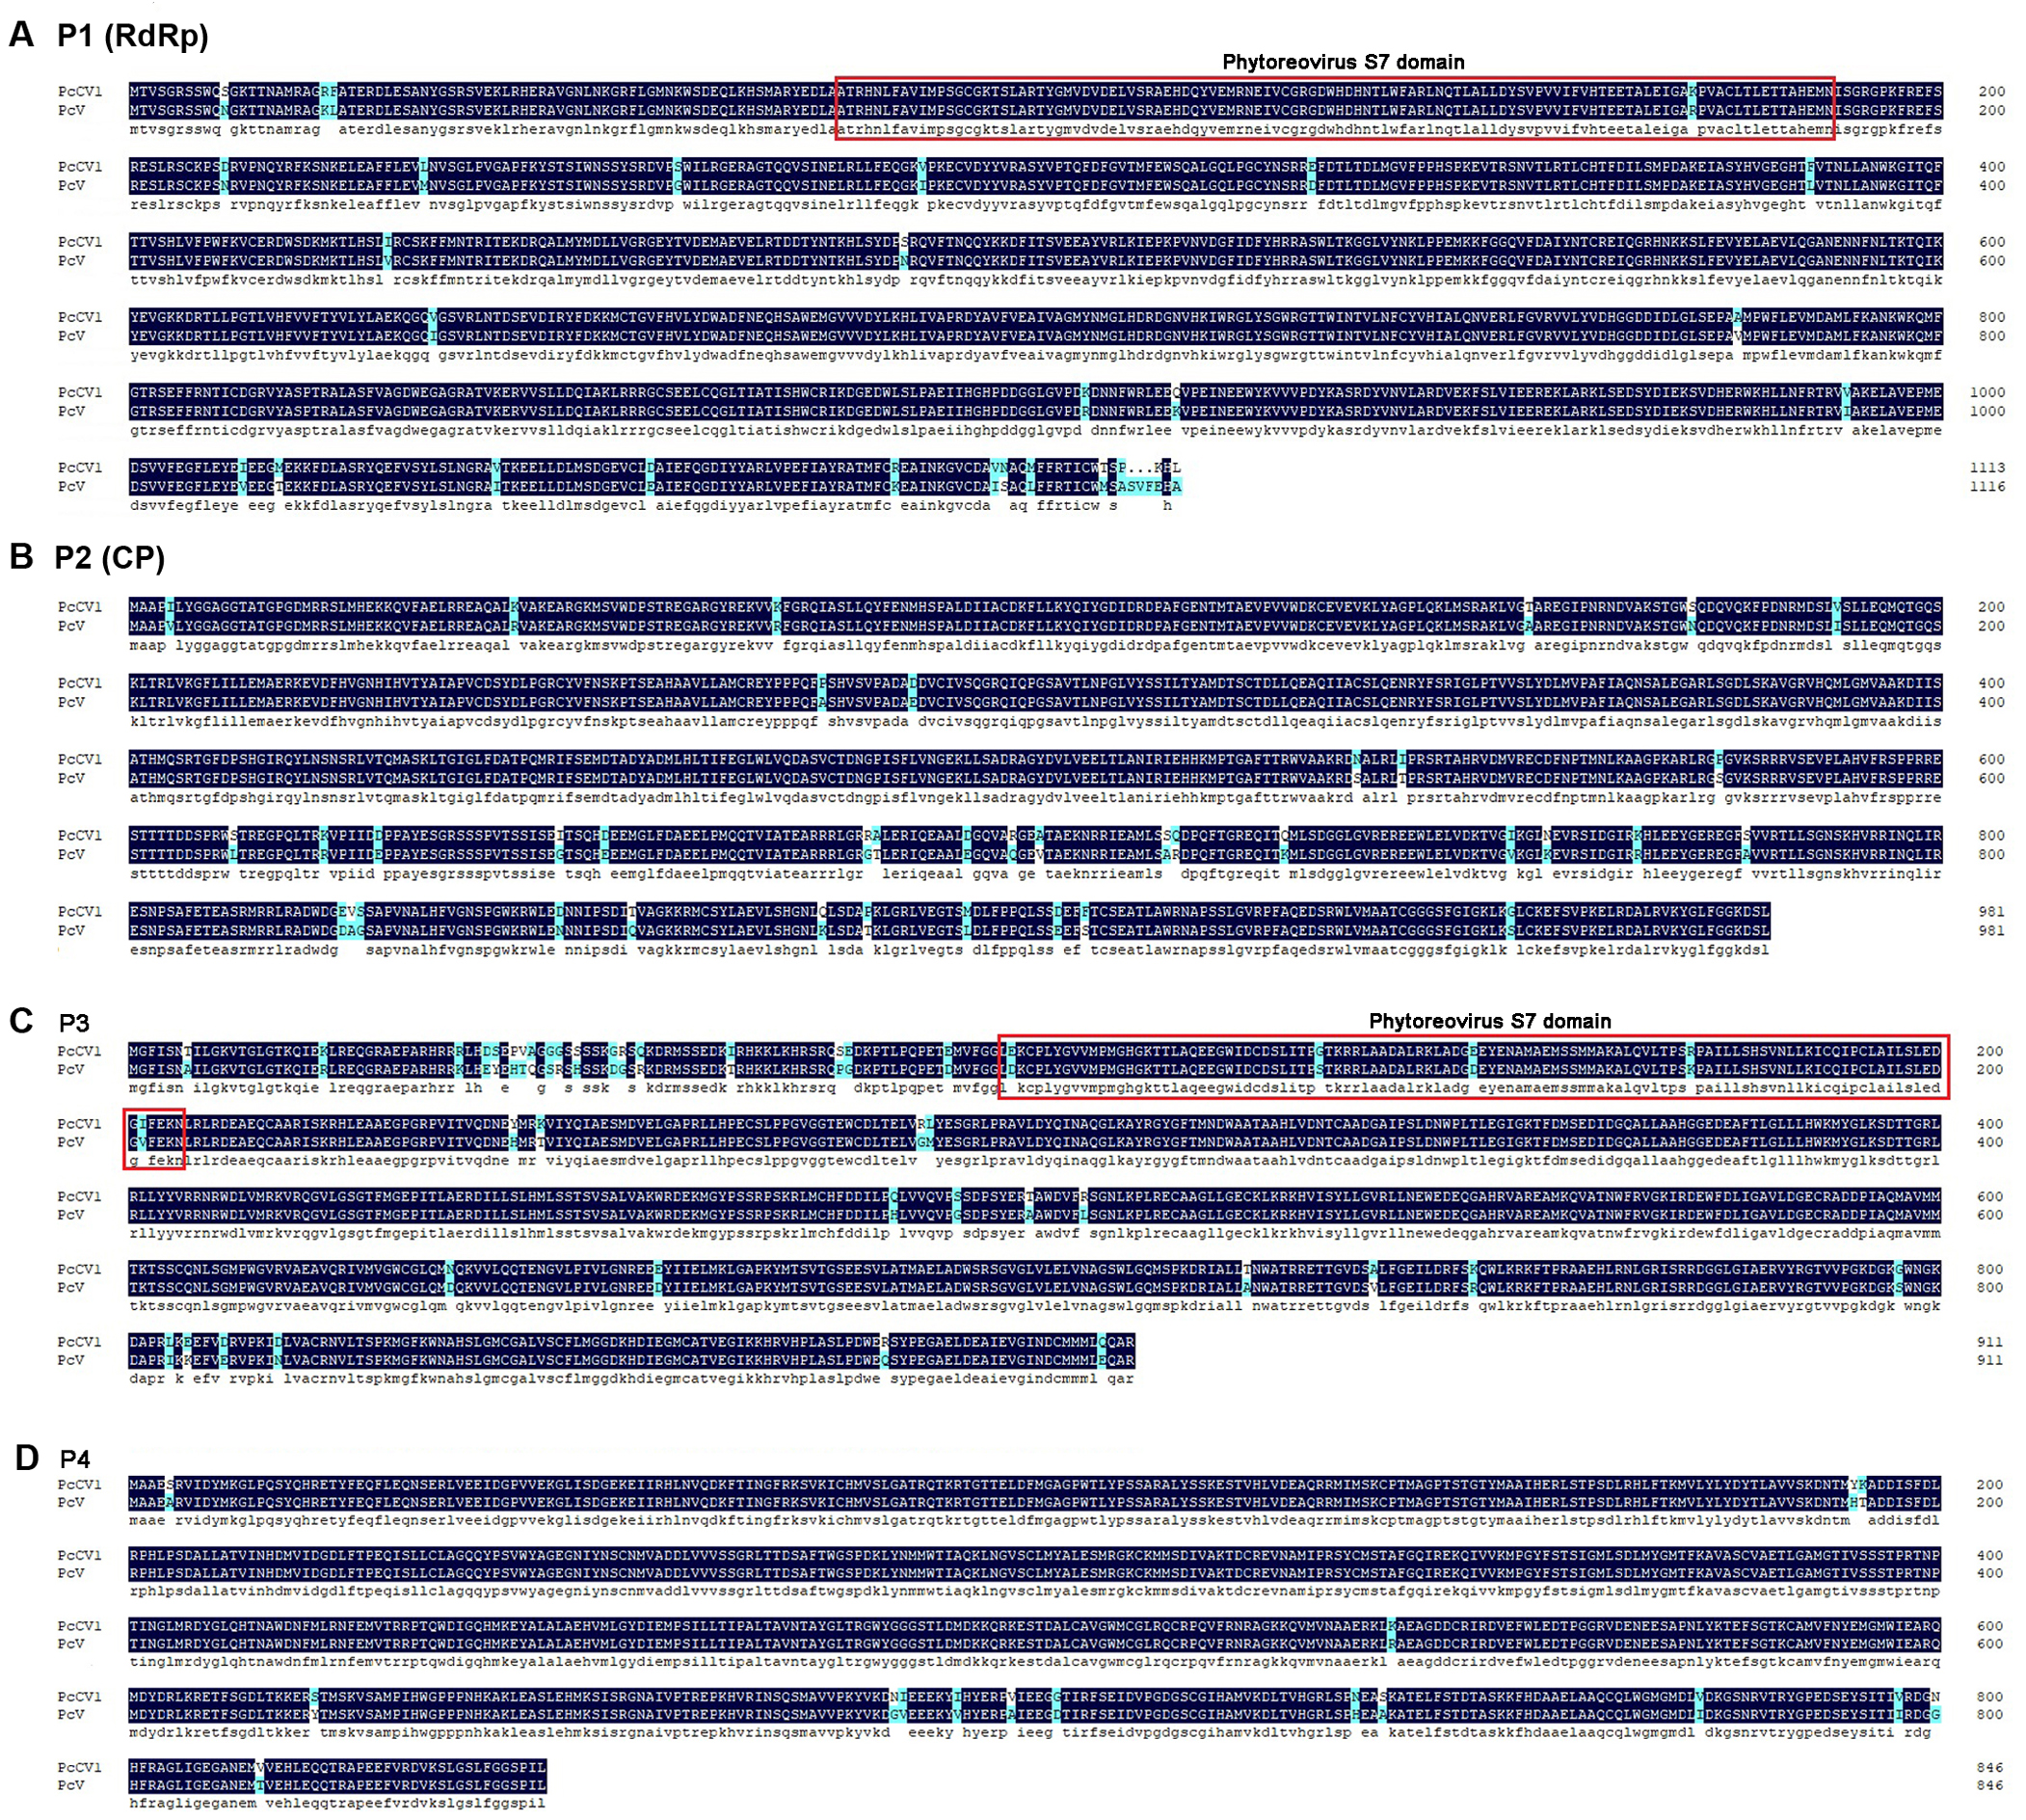


**Figure S1** Alignment analysis of putative amino-acid sequences for the corresponding genomic dsRNA-encoding proteins between PcCV1 and PcV. **(A)** P1 (RdRp) encoded by dsRNA1 of PcCV1 and PcV; **(B)** P2 (CP) encoded by dsRNA2 of PcCV1 and PcV; **(C)** P3 encoded by dsRNA3 of PcCV1 and PcV; **(D)** P4 encoded by dsRNA4 of PcCV1 and PcV. The phytoreovirus S7 domain was highlighted in red box.


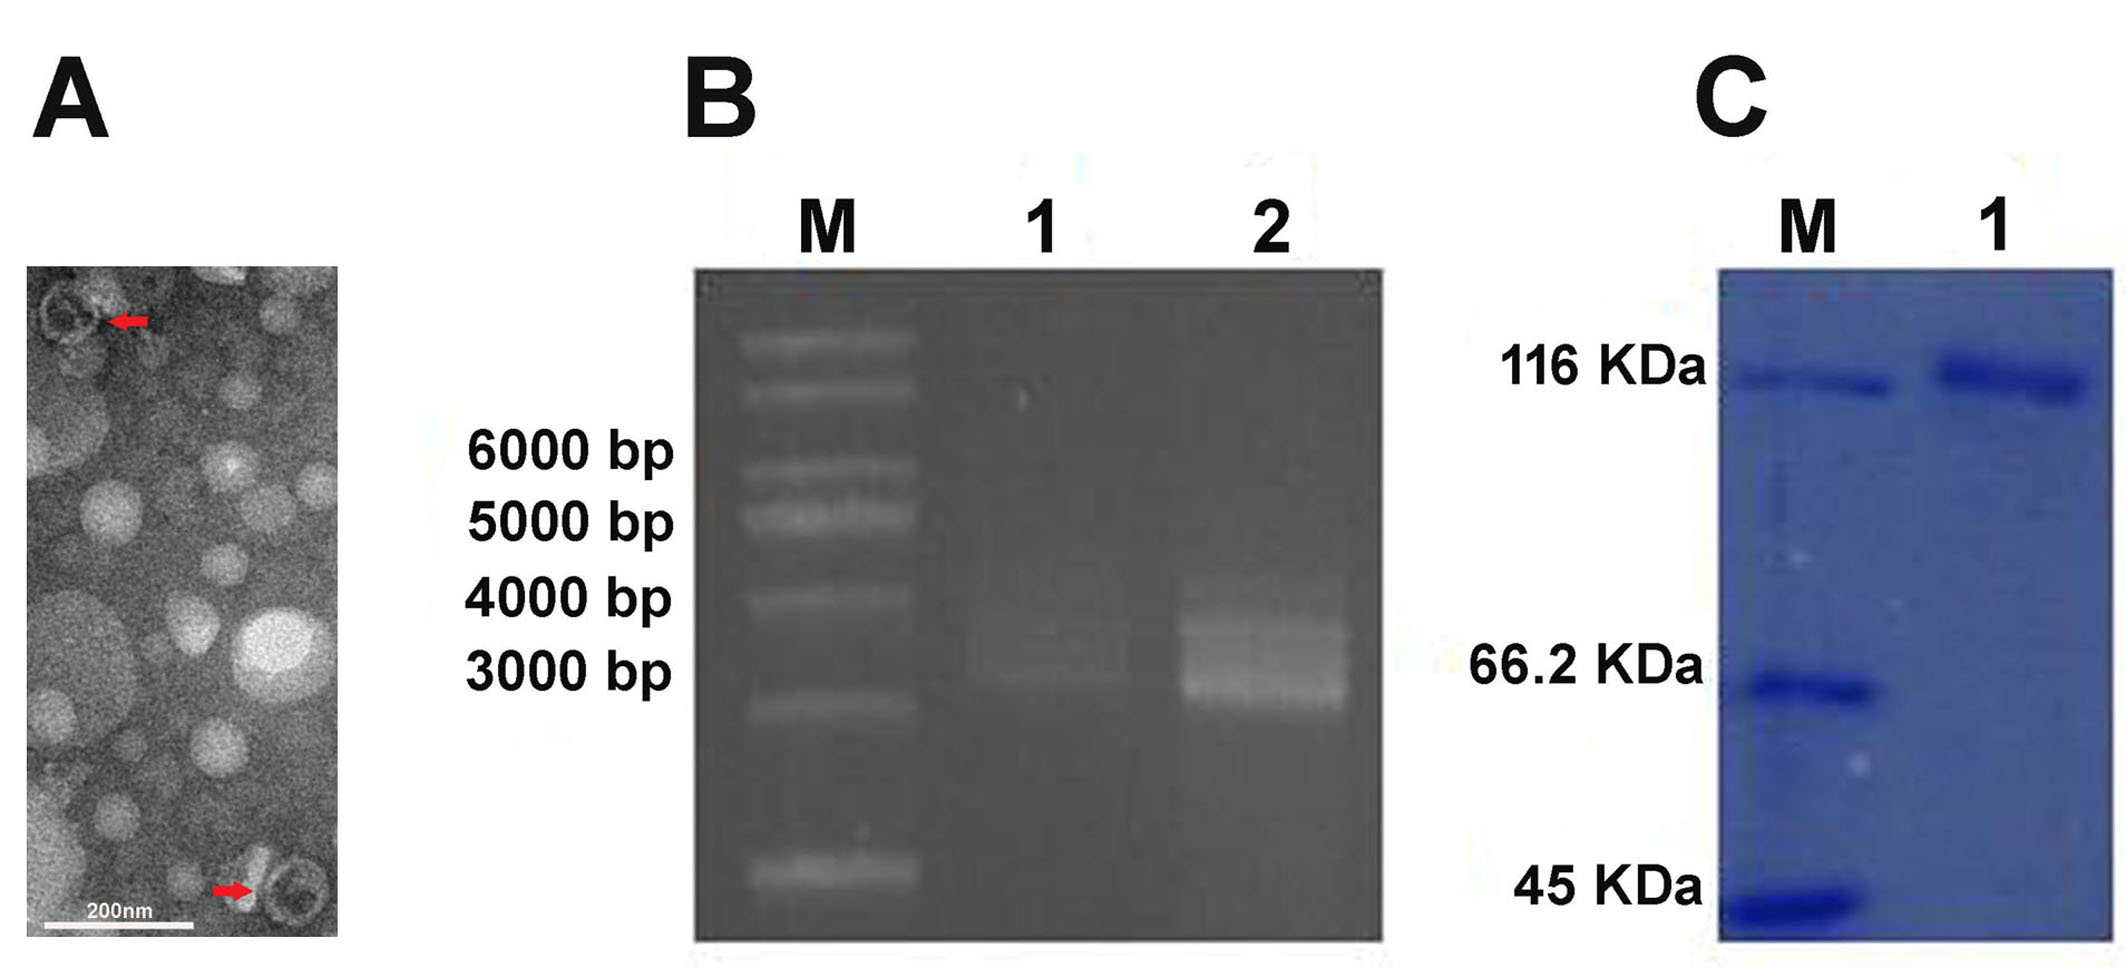


**Figure S2** Detection of viral particles (VPs) from virus-infected *P. crustosum* HS-CQ15. **(A)** Transmission electron microscopy (TEM) image of VPs purified from HS-CQ15. The VPs in the image are indicated by red arrows. **(B)** Comparison of mobility patterns of dsRNA extracted from purified VPs of PcCV1 (lane 1) and HS-CQ15 mycelia (lane 2) using 1% (w/v) agarose gel electrophoresis. Lane M indicates DNA marker DS10000 (TaKaRa, Dalian, China). **(C)** SDS-PAGE analysis of structural proteins of the purified VPs of PcCV1 (lane 1). Lane M indicates PageRuler™ Unstained Protein Ladder (Thermo Fisher Scientiﬁc, USA).


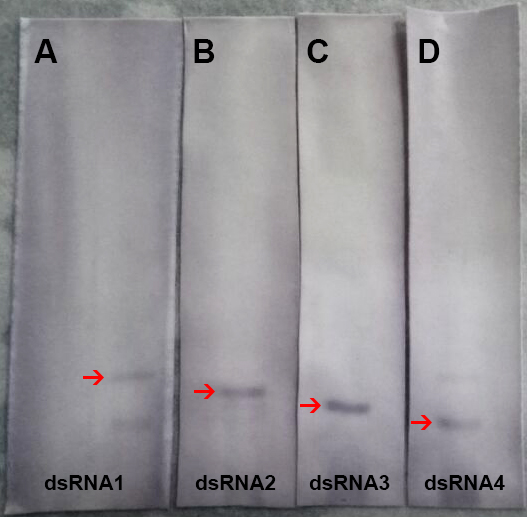


**Figure S3** The full-scan of entire original gels for the RNA blots of PcCV1 genomic dsRNAs from fungal host HS-CQ15. Panels A, B, C, and D represent the full-scan of entire original gel for dsRNA1, 2, 3, and 4, respectively, corresponding to the cropped images of blots in **Figure 1 panel B**. The dsRNAs were separated under denaturing electrophoresis conditions, blotted onto nylon membranes, and probed by DIG-labeled DNA fragments as indicated in **Figure 1 panel C**.

**Table S1** Primers used in this study.

| Name | Sequence (5’-3’) | Purpose |
| --- | --- | --- |
| P-dsRNA1-F1 | GAATAATTCCTTTGGACCTGAGG | Primers used to determine the sequence gap of the dsRNA1. |
| P-dsRNA1-R1 | AAGAATTTGCTGCACCGGATC | Primers used to determine the sequence gap of the dsRNA1. |
| P-dsRNA1-F2 | TGATCCGGTGCAGCAAATTCTT | Primers used to determine the sequence gap of the dsRNA1. |
| P-dsRNA1-R2 | CGAGCCAACACGTTGACGTAG | Primers used to determine the sequence gap of the dsRNA1. |
| P-dsRNA2-F1 | GAGAAGAAGCAGGTATTCGCCG | Primers used to determine the sequence gap of the dsRNA2. |
| P-dsRNA2-R1 | GCTCTATCCTGATATTGGCCA | Primers used to determine the sequence gap of the dsRNA2. |
| P-dsRNA2-F2 | CCAAATGGCTAGCAAATTGACCG | Primers used to determine the sequence gap of the dsRNA2. |
| P-dsRNA2-R2 | CGTTTCGCCATGCCAGAGTT | Primers used to determine the sequence gap of the dsRNA2. |
| P-dsRNA2-F3 | TAGGGGGAAGATGAGCGTAT | Primers used to determine the sequence gap of the dsRNA2. |
| P-dsRNA2-R3 | GACGGCCTTGTGACACTATAC | Primers used to determine the sequence gap of the dsRNA2. |
| P-dsRNA2-F4 | CCCTATCAGTTTCTTAGTCAATGG | Primers used to determine the sequence gap of the dsRNA2. |
| P-dsRNA2-R4 | CCTCAGCCAAGTAACTGCACAT | Primers used to determine the sequence gap of the dsRNA2. |
| P-dsRNA3-F1 | CCCATTAGGAAGCAACTCAC | Primers used to determine the sequence gap of the dsRNA2. |
| P-dsRNA3-R1 | CACTATGAATGACTGGGCT | Primers used to determine the sequence gap of the dsRNA2. |
| P-dsRNA3-F2 | GATACCTTCAAGCGTTAATGGC | Primers used to determine the sequence gap of the dsRNA3. |
| P-dsRNA3-R2 | AATTGAGGGAGCAGGGTC | Primers used to determine the sequence gap of the dsRNA3. |
| P-dsRNA3-F3 | CGGTTGTCTCTCTGCGTGT | Primers used to determine the sequence gap of the dsRNA3. |
| P-dsRNA3-R3 | CCGATGGAGCTATACCGAG | Primers used to determine the sequence gap of the dsRNA3. |
| P-dsRNA4-F1 | GAATAGCGAAAGACTGGTGGA | Primers used to determine the sequence gap of the dsRNA4. |
| P-dsRNA4-R1 | GTCGAAGATGAAACAATGGTAC | Primers used to determine the sequence gap of the dsRNA4. |
| P-dsRNA4-F2 | GCCCGGGTACTTCTCAACTAG | Primers used to determine the sequence gap of the dsRNA4. |
| P-dsRNA4-R2 | AGAGGGATCCGAGTGACTTGAC | Primers used to determine the sequence gap of the dsRNA4. |
| P-dsRNA4-F3 | CAACGCCTTCAGACCTACG | Primers used to determine the sequence gap of the dsRNA4. |
| P-dsRNA4-R3 | CTCTCTACAGTCAGTCTTGGCG | Primers used to determine the sequence gap of the dsRNA4. |
| P-dsRNA4-F4 | TTGAAATGGTTACACGACG | Primers used to determine the sequence gap of the dsRNA4. |
| P-dsRNA4-R4 | ATCCGAGTGACTTGACATCT | Primers used to determine the sequence gap of the dsRNA4. |
| Pt-dsRNA1-1 | ATGGAAGCAGATGTTTGGGACTC | Primers used to determine 5’-terminal sequence of the dsRNA1. |
| Pt-dsRNA1-2 | TGAGGGCATTATGACAGCGAAG | Primers used to determine 3’-terminal sequence of the dsRNA1. |
| Pt-dsRNA2-1 | AGACGGAAGCCTCTCGAATG | Primers used to determine 5’-terminal sequence of the dsRNA2. |
| Pt-dsRNA2-2 | CCGTACTCTTTGCAACGTCATT | Primers used to determine 3’-terminal sequence of the dsRNA2. |
| Pt-dsRNA3-1 | GTTTCAGGCTGGGGCAATGTAGG | Primers used to determine 5’-terminal sequence of the dsRNA3. |
| Pt-dsRNA3-2 | TAACTGGGCCACACGCAGAGAG | Primers used to determine 3’-terminal sequence of the dsRNA3. |
| Pt-dsRNA4-1 | GGTAGTAACCGTGTCACCCGCT | Primers used to determine 5’-terminal sequence of the dsRNA4. |
| Pt-dsRNA4-2 | CCGTTGATAGTAAACTTGTCCTGG | Primers used to determine 3’-terminal sequence of the dsRNA4. |

**Table S2** Information on the virus isolates used for sequence alignment and phylogenetic analysis of their RdRps.

| Name | Family | Genus | Abbreviation | GenBank accession no. |
| --- | --- | --- | --- | --- |
| *Amasya cherry disease associated* chrysovirus | *Chrysoviridae* | *Chrysovirus* | ACDACV | YP_001531163.1 |
| *Aspergillus fumigatus* chrysovirus | *Chrysoviridae* | *Chrysovirus* | AfuCV | CAX48749.1 |
| *Cryphonectria nitschkei* chrysovirus 1 | *Chrysoviridae* | *Chrysovirus* | CnCV1 | ACT79255.1 |
| *Fusarium oxysporum* chrysovirus 1 | *Chrysoviridae* | *Chrysovirus* | FoCV1 | ABQ53134.1 |
| *Helminthosporium* victoriae 145S virus | *Chrysoviridae* | *Chrysovirus* | Hv145SV | AAM68953.1 |
| *Penicillium chrysogenum* virus | *Chrysoviridae* | *Chrysovirus* | PcV | YP_392482 |
| *Verticillium dahliae* chrysovirus 1 | *Chrysoviridae* | *Chrysovirus* | VdCV1 | ADG21213.1 |
| *Anthurium mosaic-associated* virus-PHA | *Chrysoviridae* | Unclassified, chrysoviruses-related viruses | AmAV | [ACU11563.1](https://www.ncbi.nlm.nih.gov/protein/255367544) |
| Aspergillus mycovirus 1816 | *Chrysoviridae* | Unclassified, chrysoviruses-related viruses | AmV1816 | ABX79996.1 |
| Brassica campestris chrysovirus 1-Hubei | *Chrysoviridae* | Unclassified, chrysoviruses-related viruses | BcCV1 | AKU48197.1 |
| Botryosphaeria dothidea chrysovirus 1- LW-1 | *Chrysoviridae* | Unclassified, chrysoviruses-related viruses | BdCV1 | AGZ84312.1 |
| Colletotrichum gloeosporioides chrysovirus 1-HZ-1 | *Chrysoviridae* | Unclassified, chrysoviruses-related viruses | CgCV1 | ALW95408.1 |
| Fusarium graminearum dsRNA mycovirus-2 | *Chrysoviridae* | Unclassified, chrysoviruses-related viruses | FgV2 | ADW08802.1 |
| Fusarium graminearum mycovirus-China-9 | *Chrysoviridae* | Unclassified, chrysoviruses-related viruses | FgV-ch9 | [ADU54123.1](https://www.ncbi.nlm.nih.gov/protein/315633155) |
| Fusarium oxysporum f. sp.Dianthi virus-Fod 116 | *Chrysoviridae* | Unclassified, chrysoviruses-related viruses | FodV1 | [AKP45145.1](https://www.ncbi.nlm.nih.gov/protein/873330031) |
| Magnaporthe oryzae chrysovirus 1-A | *Chrysoviridae* | Unclassified, chrysoviruses-related viruses | MoCV1-A | [BAJ15133.1](https://www.ncbi.nlm.nih.gov/protein/304361430) |
| Magnaporthe oryzae chrysovirus 1-B | *Chrysoviridae* | Unclassified, chrysoviruses-related viruses | MoCV1-B | [BAO20927.1](https://www.ncbi.nlm.nih.gov/protein/565410873) |
| Persea americana chrysovirus-Spain | *Chrysoviridae* | Unclassified, chrysoviruses-related viruses | PaCV | AJA37498.1 |
| Raphanus sativus chrysovirus 1-D13 | *Chrysoviridae* | Unclassified, chrysoviruses-related viruses | RsCV1 | AFE83590.1 |
| *Penicillium stoloniferum* virus S | *Partitiviridae* | *Gammapartitivirus* | PsV-S | YP_052856.2 |
| *Penicillium digitatum* Gammapartitivirus 1 | *Partitiviridae* | *Gammapartitivirus* | PdGv1 |  |

**Table S3** Amino acid sequence identity between viral proteins of PcCV1 and PcV.

| Proteins | Amino acid sequence identity between PcCV1 and PcV |
| --- | --- |
| P1 (RdRp) | 97.05% |
| P2 (CP) | 96.03% |
| P3 | 95.29% |
| P4 | 98.11% |
